# Supplementary material
Source: PubMed Central journal article supplement (PMC7960387)
Supplement: 16-00900.pdf [file 16-00900.pdf]

**On-line Table 1: Hierarchic regression models for healthy controls, predicting performance in the cognitive composite score (NP<sub>total</sub>) by demographic variables (block 1), volumes (block 2), and QSM (block 3)**

| DGM Region | Block          | Predictor        | Final $\beta$      | $\beta$ P Value    | VIF                | R <sup>2</sup>     | $\Delta$ R <sup>2</sup> | Model F            | Model P Value      | F Change           |                    |
|------------|----------------|------------------|--------------------|--------------------|--------------------|--------------------|-------------------------|--------------------|--------------------|--------------------|--------------------|
| Caudate    | 1 <sup>a</sup> | Age              | -0.326             | .057               | 1.009              | 0.423 <sup>a</sup> | 0.423 <sup>a</sup>      | 5.622 <sup>a</sup> | .005 <sup>a</sup>  | 5.622 <sup>a</sup> |                    |
|            |                | Sex <sup>a</sup> | 0.498 <sup>a</sup> | .006 <sup>a</sup>  | 1.009 <sup>a</sup> |                    |                         |                    |                    |                    |                    |
|            |                | Education        | 0.121              | .509               | 1.238              |                    |                         |                    |                    |                    |                    |
| Putamen    | 2              | Volume           | -0.185             | .297               | 1.150              | 0.450              | 0.027                   | 4.500              | .008               | 1.077              |                    |
|            |                | 3                | QSM                | -0.069             | .690               | 1.108              | 0.454                   | 0.004              | 3.496              | .019               | 0.164              |
|            |                |                  | 1                  | Age                | -0.325             | .054               | 1.009                   | 0.423 <sup>a</sup> | 0.423 <sup>a</sup> | 5.622 <sup>a</sup> | .005 <sup>a</sup>  |
| GP         | 1 <sup>a</sup> | Sex <sup>a</sup> | 0.499 <sup>a</sup> | .005 <sup>a</sup>  | 1.009 <sup>a</sup> |                    |                         |                    |                    |                    |                    |
|            |                | Education        | 0.158              | .357               | 1.113              |                    |                         |                    |                    |                    |                    |
|            |                | Volume           | -0.218             | .195               | 1.054              | 0.466              | 0.043                   | 4.795              | .006               | 1.756              |                    |
|            | 3              | QSM              | -0.056             | .743               | 1.123              | 0.469              | 0.003                   | 3.703              | .015               | 0.110              |                    |
|            |                | 1 <sup>a</sup>   | Age                | -0.325             | .061               | 1.009              | 0.423 <sup>a</sup>      | 0.423 <sup>a</sup> | 5.622 <sup>a</sup> | .005 <sup>a</sup>  | 5.622 <sup>a</sup> |
|            | Thalamus       | 1 <sup>a</sup>   | Sex <sup>a</sup>   | 0.499 <sup>a</sup> | .006 <sup>a</sup>  | 1.009              |                         |                    |                    |                    |                    |
| Education  |                |                  | 0.192              | .269               | 1.071              |                    |                         |                    |                    |                    |                    |
| Volume     |                |                  | -0.115             | .504               | 1.072              | 0.432              | 0.009                   | 4.191              |                    | 0.364              |                    |
| 3          |                | QSM              | -0.077             | .663               | 1.134              | 0.438              | 0.005                   | 3.269              |                    | 0.195              |                    |
|            |                | 1 <sup>a</sup>   | Age                | -0.326             | .056               | 1.009              | 0.423 <sup>a</sup>      | 0.423 <sup>a</sup> | 5.622 <sup>a</sup> | .005 <sup>a</sup>  | 5.622 <sup>a</sup> |
| 2          |                | Sex <sup>a</sup> | 0.498 <sup>a</sup> | .006 <sup>a</sup>  | 1.009 <sup>a</sup> |                    |                         |                    |                    |                    |                    |
|            | Education      | 0.138            | .438               | 1.177              |                    |                    |                         |                    |                    |                    |                    |
|            | Volume         | -0.198           | .258               | 1.121              | 0.458              | 0.035              | 4.652                   | .007               | 1.427              |                    |                    |
| 3          | QSM            | 0.009            | .955               | 1.054              | 0.458              | <0.001             | 3.554                   | .017               | 0.003              |                    |                    |

**Note:**—R<sup>2</sup> indicates variance in the NP<sub>total</sub> explained by each block of predictors;  $\Delta$ R<sup>2</sup>, change in explained variance by each block of predictors compared with the previous block; VIF, variance inflation factor.

<sup>a</sup> Significant changes in F by including a block of predictors and predictors within significant blocks.

**On-line Table 2: Hierarchic regression models for patients with MS, predicting performance in the cognitive composite score (NP<sub>total</sub>) by demographic variables (block 1), volumes (block 2), and QSM (block 3)**

| DGM Region     | Block               | Predictor           | Final $\beta$       | $\beta$ P Value   | VIF                | R <sup>2</sup>     | $\Delta$ R <sup>2</sup> | Model F            | Model P Value       | F Change           |       |
|----------------|---------------------|---------------------|---------------------|-------------------|--------------------|--------------------|-------------------------|--------------------|---------------------|--------------------|-------|
| Caudate        | 1                   | Age                 | -0.136              | .399              | 1.072              | 0.149              | 0.149                   | 2.099              | .118                | 2.099              |       |
|                |                     | Sex                 | 0.255               | .106              | 1.000              |                    |                         |                    |                     |                    |       |
|                |                     | Education           | -0.261              | .118              | 1.123              |                    |                         |                    |                     |                    |       |
| Putamen        | 2                   | Volume              | -0.006              | .971              | 1.039              | 0.151              | 0.002                   | 1.559              | .207                | 0.096              |       |
|                |                     | 3                   | QSM                 | -0.225            | .170               | 1.089              | 0.198                   | 0.046              | 1.674               | .168               | 1.963 |
|                |                     |                     | 1                   | Age               | -0.140             | .354               | 1.069                   | 0.149              | 0.149               | 2.099              | .118  |
| GP             | 2 <sup>a</sup>      | Sex                 | 0.256               | .084              | 1.000              |                    |                         |                    |                     |                    |       |
|                |                     | Education           | -0.249              | .104              | 1.080              |                    |                         |                    |                     |                    |       |
|                |                     | Volume <sup>a</sup> | 0.313 <sup>a</sup>  | .037 <sup>a</sup> | 1.003              | 0.248 <sup>a</sup> | 0.099 <sup>a</sup>      | 2.890 <sup>a</sup> | .036 <sup>a</sup>   | 4.628 <sup>a</sup> |       |
|                | 3                   | QSM                 | -0.224              | .129              | 1.008              | 0.298              | 0.050                   | 2.889              | .028                | 2.420              |       |
|                |                     | 1                   | Age                 | -0.150            | .324               | 1.068              | 0.149                   | 0.149              | 2.099               | .118               | 2.099 |
|                | Thalamus            | 2                   | Sex                 | 0.256             | .086               | 1.000              |                         |                    |                     |                    |       |
| Education      |                     |                     | -0.207              | .175              | 1.069              |                    |                         |                    |                     |                    |       |
| Volume         |                     |                     | 0.162               | .273              | 1.009              | 0.186              | 0.037                   | 1.993              | .117                | 1.577              |       |
| 3 <sup>a</sup> |                     | QSM <sup>a</sup>    | -0.323 <sup>a</sup> | .033 <sup>a</sup> | 1.009              | 0.289 <sup>a</sup> | 0.103 <sup>a</sup>      | 2.763 <sup>a</sup> | .034 <sup>a</sup>   | 4.944 <sup>a</sup> |       |
|                |                     | 1                   | Age                 | -0.161            | .253               | 1.069              | 0.149                   | 0.149              | 2.099               | .118               | 2.099 |
| 2 <sup>a</sup> |                     | Sex                 | 0.257               | .064              | 1.000              |                    |                         |                    |                     |                    |       |
|                | Education           | -0.160              | .259                | 1.086             |                    |                    |                         |                    |                     |                    |       |
|                | Volume <sup>a</sup> | 0.488 <sup>a</sup>  | .001 <sup>a</sup>   | 1.015             | 0.386 <sup>a</sup> | 0.237 <sup>a</sup> | 5.503 <sup>a</sup>      | .002 <sup>a</sup>  | 13.526 <sup>a</sup> |                    |       |
| 3              | QSM                 | -0.038              | .781                | 1.008             | 0.388              | 0.079              | 4.302                   | .004               | 0.079               |                    |       |

<sup>a</sup> Significant changes in F by including a block of predictors and predictors within significant blocks.
